# Supplementary material for: Advanced Iterative Procedures for Solving the Implicit Colebrook Equation for Fluid Flow Friction
Source: Hindawi journal article supplement (doi:10.1155/2018/5451034), 2018-01-01
Supplement: f1 [file 5451034.f1.pdf]

List of Equations used in this paper:

$$\frac{1}{\sqrt{\lambda}} = \underbrace{-2 \cdot \log_{10} \left( \frac{2.51}{Re \cdot \sqrt{\lambda}} + \frac{\varepsilon}{3.7 \cdot D} \right)}_{\text{Colebrook}} \quad (1)$$

$$x_0 = \frac{1}{\sqrt{\lambda_0}} = \underbrace{-2 \cdot \log_{10} \left( \frac{\varepsilon}{3.7 \cdot D} \right)}_{\text{rough part of Colebrook}} \quad (2)$$

$$\frac{1}{\sqrt{\lambda}} = -2 \cdot \log_{10} \left( \frac{2 \cdot 2.51 \cdot W(y)}{Re \cdot \ln(10)} + \frac{\varepsilon}{3.7 \cdot D} \right) = -2 \cdot \log_{10} \left( 10^{\frac{-W(y)}{\ln(10)}} + \frac{\varepsilon}{3.7 \cdot D} \right) \quad (3)$$

$$\text{where } y = \frac{Re \cdot \ln(10)}{2 \cdot 2.51} \approx \frac{Re}{2.18}$$

$$\lambda = \left( \frac{2}{\ln(10)} \cdot W(e^\alpha) - \frac{Re \cdot \frac{\varepsilon}{D}}{3.7 \cdot 2.51} \right)^{-2} \quad (4)$$

$$\text{Where } \alpha = \left( \frac{Re \cdot \frac{\varepsilon}{D} \cdot \ln(10)}{2 \cdot 2.51 \cdot 3.7} - \ln \frac{2 \cdot 3.7}{Re \cdot \ln(10)} \right)$$

$$f(\lambda) = \underbrace{\frac{1}{\sqrt{|\lambda|}} + 2 \cdot \log_{10} \left( \frac{2.51}{Re \cdot \sqrt{|\lambda|}} + \frac{\varepsilon}{3.7 \cdot D} \right)}_{\text{Colebrook: } f(\lambda)=0} = 0 \quad (5)$$

$$f'(\lambda) = \frac{d}{d\lambda} f(\lambda) = -\frac{1}{2} \cdot \left( \frac{1}{\sqrt{|\lambda|}} \right)^3 \cdot \underbrace{\left( 1 + \frac{2 \cdot 2.51}{\ln(10) \cdot Re \cdot \left( \frac{2.51}{Re \cdot \sqrt{|\lambda|}} + \frac{\varepsilon}{3.7 \cdot D} \right)} \right)}_{\text{1st derivative } f'(\lambda) \text{--Analytical}} \quad (6)$$

$$\lambda_1 = \underbrace{\lambda_0 - \frac{f(\lambda_0)}{f'(\lambda_0)}}_{\text{Newton-Raphson}} = \lambda_0 - \frac{\frac{1}{\sqrt{|\lambda_0|}} + 2 \cdot \log_{10} \left( \frac{2.51}{Re \cdot \sqrt{|\lambda_0|}} + \frac{\varepsilon}{3.7 \cdot D} \right)}{-\frac{1}{2} \cdot \left( \frac{1}{\sqrt{|\lambda_0|}} \right)^3 \cdot \left( 1 + \frac{2.18}{Re \cdot \left( \frac{2.51}{Re \cdot \sqrt{|\lambda_0|}} + \frac{\varepsilon}{3.7 \cdot D} \right)} \right)} \quad (7)$$

$$f(x) = \underbrace{x + 2 \cdot \log_{10} \left( \frac{2.51 \cdot x}{Re} + \frac{\varepsilon}{3.7 \cdot D} \right)}_{\text{Colebrook: } f(x)=0} = 0 \quad (8)$$

$$f'(x) = \frac{d}{dx} f(x) = \underbrace{1 + 2 \cdot \frac{\frac{2.51}{Re \cdot \ln(10)}}{\frac{\varepsilon}{3.7 \cdot D} + \frac{2.51}{Re} \cdot x}}_{\text{1st derivative } f'(x) \text{--Analytical}} \quad (9)$$

$$x_1 = \underbrace{x_0 - \frac{f(x_0)}{f'(x_0)}}_{\text{Newton-Raphson}} = x_0 - \frac{x_0 + 2 \cdot \log_{10} \left( \frac{2.51 \cdot x_0}{Re} + \frac{\varepsilon}{3.7 \cdot D} \right)}{1 + 2 \cdot \frac{\frac{2.51}{Re \cdot \ln(10)}}{\frac{\varepsilon}{3.7 \cdot D} + \frac{2.51}{Re} \cdot x_0}} \quad (10)$$

$$f'(x) = \frac{d}{dx} f(x) = \underbrace{\frac{5.02}{Re \cdot \ln(10) \cdot \left( \frac{10}{37} \cdot \frac{\varepsilon}{D} + \frac{251 \cdot x}{100 \cdot Re} \right)} + 1}_{\text{1st derivative } f'(x) \text{--MATLAB}} = \frac{9287 \cdot \ln(10) \cdot x + 1000 \cdot \ln(10) \cdot \frac{\varepsilon}{D} \cdot Re + 18574}{\ln(10) \cdot \left( 9287 \cdot x + 1000 \cdot \frac{\varepsilon}{D} \cdot Re \right)} \quad (11)$$

$$x_1 = \underbrace{x_0 - \frac{f(x_0)}{f'(x_0)}}_{\text{Newton-Raphson}} = x_0 - \frac{x_0 + 2 \cdot \log_{10} \left( \frac{2.51 \cdot x_0}{Re} + \frac{\varepsilon}{3.7 \cdot D} \right)}{\frac{21384.11 \cdot x_0 + 2302.58 \cdot \frac{\varepsilon}{D} Re + 18574}{21384.11 \cdot x_0 + 2302.58 \cdot \frac{\varepsilon}{D} Re}} \quad (12)$$

$$x_1 = x_0 - \underbrace{\frac{\frac{f(x_0)}{f'(x_0)}}{1 - \frac{f(x_0) \cdot f''(x_0)}{2 \cdot (f'(x_0))^2}}}_{\text{Halley}} = x_0 - \underbrace{\frac{2 \cdot f(x_0) \cdot f'(x_0)}{2 \cdot (f'(x_0))^2 - f(x_0) \cdot f''(x_0)}}_{\text{Halley}} \quad (13)$$

$$f''(x) = \frac{d}{dx} f'(x) = \frac{-12.6}{\underbrace{Re^2 \cdot \ln(10) \cdot \left( \frac{10 \cdot \varepsilon}{37 \cdot D} + \frac{251 \cdot x}{100 \cdot Re} \right)^2}_{\text{2nd derivative } f''(x) - \text{MATLAB}}} = \frac{-172496738}{\ln(10) \cdot \left( 9287 \cdot x + 1000 \cdot \frac{\varepsilon}{D} Re \right)^2} \quad (14)$$

$$x_1 = x_0 - \underbrace{\frac{6 \cdot f(x_0) \cdot (f'(x_0))^2 - 3 \cdot (f(x_0))^2 \cdot f'(x_0)}{6 \cdot (f'(x_0))^3 - 6 \cdot f(x_0) \cdot f'(x_0) \cdot f''(x_0) + (f(x_0))^2 \cdot f'''(x_0)}}_{\text{3rd order Householder}} \quad (15)$$

$$f'''(x) = \frac{d}{dx} f''(x) = \frac{63.253}{\underbrace{Re^3 \cdot \ln(10) \cdot \left( \frac{10 \cdot \varepsilon}{37 \cdot D} + \frac{251 \cdot x}{100 \cdot Re} \right)^3}_{\text{3rd derivative } f'''(x) - \text{MATLAB}}} = \frac{3203954411612}{\ln(10) \cdot \left( 9287 \cdot x + 1000 \cdot \frac{\varepsilon}{D} Re \right)^3} \quad (16)$$

$$x_1 = x_0 - \underbrace{\frac{f(x_0)}{f'(x_0)} - \frac{f''(x_0) \cdot (f(x_0))^2}{2 \cdot (f'(x_0))^3}}_{\text{Schröder}} \quad (17)$$

$$\lambda_1 = \lambda_0 - \frac{f(\lambda_0)}{\frac{f(\lambda_1) - f(\lambda_0)}{\lambda_1 - \lambda_0}} \quad (18)$$

$$x_1 = x_0 - \frac{f(x_0)}{\frac{f(x_1) - f(x_0)}{x_1 - x_0}} \quad (19)$$

$$\left. \begin{aligned} x_0 &= 7.273124147 \\ f(x_0) &= x_0 + 2 \cdot \log_{10} \left( \frac{2.51 \cdot x_0}{Re} + \frac{\varepsilon}{3.7 \cdot D} \right) = -2.692152546 \\ f'(x_0) &= \frac{9287 \cdot \ln(10) \cdot x_0 + 1000 \cdot \ln(10) \cdot \frac{\varepsilon}{D} Re + 18574}{\ln(10) \cdot \left( 9287 \cdot x_0 + 1000 \cdot \frac{\varepsilon}{D} Re \right)} = \frac{5.02}{Re \cdot \ln(10) \cdot \left( \frac{10 \cdot \varepsilon}{37 \cdot D} + \frac{2.51 \cdot x_0}{Re} \right)} + 1 = 1.041894438 \\ y_0 &= x_0 - \frac{f(x_0)}{f'(x_0)} = 7.273124147 - \frac{-2.692152546}{1.041894} = 9.857025593360860 \\ f(y_0) &= y_0 + 2 \cdot \log_{10} \left( \frac{2.51 \cdot y_0}{Re} + \frac{\varepsilon}{3.7 \cdot D} \right) = -0.006232787 \\ z_0 &= y_0 - \frac{f(y_0)}{f'(y_0)} = 9.863035589 \\ f(z_0) &= z_0 + 2 \cdot \log_{10} \left( \frac{2.51 \cdot z_0}{Re} + \frac{\varepsilon}{3.7 \cdot D} \right) = -0.006232787 \\ x_1 &= z_0 - \frac{f(z_0)}{f'(x_0) \cdot \left[ 1 - 2 \cdot \frac{f(y_0)}{f(x_0)} - \left( \frac{f(y_0)}{f(x_0)} \right)^2 \right] \cdot \left[ 1 - 2 \cdot \frac{f(z_0)}{f(y_0)} \right] \cdot \left[ 1 - 2 \cdot \frac{f(z_0)}{f(x_0)} \right]} = 9.863034564 \\ x_1 &= 9.863034564 \rightarrow \lambda_1 = 0.010279663295529 \end{aligned} \right\} \quad (20)$$

$$f(z) = z \cdot e^z - y = 0 \quad (21)$$

$$f'(z) = e^z \cdot (z + 1) \quad (22)$$

$$z_1 = z_0 - \frac{f(z_0)}{f'(z_0)} = \underbrace{z_0 - \frac{z_0 \cdot e^{z_0} - y}{e^{z_0} \cdot (z_0 + 1)}}_{\text{Newton-Raphson}} = z_0 - \frac{z_0 \cdot e^{z_0} - \frac{Re}{2.18}}{e^{z_0} \cdot (z_0 + 1)} \quad (23)$$

$$z_1 = z_0 - \frac{f(z_0)}{f'(z_0) - \frac{f(z_0) \cdot f''(z_0)}{2 \cdot f'(z_0)}} = z_0 - \underbrace{\frac{z_0 \cdot e^{z_0} - y}{e^{z_0} \cdot (z_0 + 1) - \frac{(z_0 \cdot e^{z_0} - y) \cdot (z_0 + 2)}{2 \cdot (z_0 + 1)}}}_{\text{Halley}} \quad (24)$$

$$f''(z) = e^z \cdot (z + 2) \quad (25)$$

$$z_1 = z_0 - \frac{f(z_0)}{f'(z_0)} - \frac{f''(z_0) \cdot (f(z_0))^2}{2 \cdot (f'(z_0))^3} = \underbrace{z_0 - \frac{z \cdot e^z - y}{e^z \cdot (z + 1)} - \frac{e^z \cdot (z + 2) \cdot (z \cdot e^z - y)^2}{2 \cdot (e^z \cdot (z + 1))^3}}_{\text{Schröder}} \quad (26)$$

$$\frac{1}{\sqrt{\lambda_0}} \approx \underbrace{8 - \frac{2 \cdot A}{2 - A \cdot B}}_{\text{Halley}} \approx \underbrace{8 - A - \frac{A^2 \cdot B}{2}}_{\text{Schröder}} \approx \underbrace{8 - \frac{6 \cdot A - 3 \cdot A^2 \cdot B}{6 - 6 \cdot A \cdot B + A^2 \cdot C}}_{3^{rd} \text{ order}} \quad (27)$$

$$\left. \begin{aligned} \frac{1}{\sqrt{\lambda_1}} &\approx \underbrace{-2 \cdot \log_{10} \left( \frac{2.51}{Re} \cdot \frac{1}{\sqrt{\lambda_0}} + \frac{\varepsilon}{3.7 \cdot D} \right)}_{\text{1st Colebrook's acceleration}} \\ \frac{1}{\sqrt{\lambda_2}} &\approx \underbrace{-2 \cdot \log_{10} \left( \frac{2.51}{Re} \cdot \frac{1}{\sqrt{\lambda_1}} + \frac{\varepsilon}{3.7 \cdot D} \right)}_{\text{2st Colebrook's acceleration}} = \underbrace{-2 \cdot \log_{10} \left( \frac{2.51}{Re} \cdot \left( \underbrace{-2 \cdot \log_{10} \left( \frac{2.51}{Re} \cdot \frac{1}{\sqrt{\lambda_0}} + \frac{\varepsilon}{3.7 \cdot D} \right)}_{\text{1st Colebrook's acceleration}} \right) + \frac{\varepsilon}{3.7 \cdot D} \right)}_{\text{2st Colebrook's acceleration}} \\ &\vdots \\ \frac{1}{\sqrt{\lambda_{i+1}}} &\approx \underbrace{-2 \cdot \log_{10} \left( \frac{2.51}{Re} \cdot \frac{1}{\sqrt{\lambda_i}} + \frac{\varepsilon}{3.7 \cdot D} \right)}_{\text{Colebrook-acceleration}} \end{aligned} \right\} \quad (28)$$

$$A \approx 8 + 2 \cdot \log_{10} \left( \frac{16}{Re} + \frac{\varepsilon}{3.7 \cdot D} \right) \quad (29)$$

$$B \approx \frac{-74914381.46}{\nabla^2} \quad (30)$$

$$C \approx \frac{1391459721232.67}{\nabla^3} \quad (31)$$

$$\nabla \approx 74205.5 + 1000 \cdot \frac{\varepsilon}{D} \cdot Re \quad (32)$$

$$\left. \begin{aligned} \frac{1}{\sqrt{\lambda}} &\approx -2 \cdot \log_{10} \left( \frac{\varepsilon}{3.7 \cdot D} - \frac{5.02}{Re} \cdot \alpha_1 \right) \\ \alpha_1 &\approx \log_{10} \left( \frac{\varepsilon}{3.7 \cdot D} - \frac{5.02}{Re} \cdot \alpha_2 \right) \\ \alpha_2 &\approx \log_{10} \left( \frac{\varepsilon}{3.7 \cdot D} - \frac{13}{Re} \right) \end{aligned} \right\} \quad (33)$$
